# Supplementary material
Source: publisher figshare collection journal article supplement (https://gsapubs.figshare.com/ndownloader/files/39498334)
Supplement: Supplementary file 1 [file 39498334]

|  |  | GS basin | | FOZ & DEM basins | |
| --- | --- | --- | --- | --- | --- |
| Layer | Age (Ma) | Mean CaCO3 content (%) | Variability (%) | Mean CaCO3 content (%) | Variability (%) |
| Sea Floor – Top Miocene | 0-6 | 0.6 | 0.6 | 3 | 3 |
| Top Miocene – Top Paleogene | 6-23 | 25 | 25 | 90 | 10 |
| Top Paleogene – Top Maastrichian | 23-66 | 25 | 25 | 60 | 40 |
| Top Maastrichtian- Top Santonian | 66-83 | 4 | 4 | 2 | 2 |
| Top Santonian – Top Albian | 83-103 | 4 | 4 | 2 | 2 |
| Top Albian – Top Hauterivian | 103-130 | 90 | 10 | 11 | 11 |
|  |  | Mean volcaniccontent (%) | Variability (%) |  |  |
| Top Hauterivian - Top basement | 130-165 | 50 | 50 |  |  |

TABLE S3. CAC03 AND VOLCANIC CONTENTS
